# Supplementary material
Source: Research Square preprint supplement (doi:10.21203/rs.3.rs-9373312/v1)
Supplement: Supplementary file 1 [file 769f5972788dc415cfdcf040.docx]

**Nucleotide depletion signals early-stage soil stable carbon collapse in anthropogenically disturbed alpine ecosystems**

**Supplementary Table 1**. **Sampling information of metabolome and metagenome of natural soil in different region and elevations**

| Region | sample size of metabolome/metagenome | Pioneer species | Sampling site of natural soil | Elevation (m) |
| --- | --- | --- | --- | --- |
| Baiyu  country | 4 × 3 = 12 | *Larix mastersiana;*  *Abies faxoniana* | 30° 15' 20.37"N, 99° 5' 12.50"E | 4235 |
| 30° 30' 20.24"N, 99° 2' 11.55"E | 4110 |
| *Abies faxoniana* | 30° 39' 23.15"N, 99° 7' 10.56"E | 4005 |
| 30° 37' 5.95"N, 99° 9' 34.31"E | 4058 |
| Yajiang  country | 12 × 3 = 36 | *Rubus biflorus* | 30° 42' 6.18"N, 99° 10' 12.23"E | 3239 |
| 30° 35' 22.25"N, 99° 15' 10.24"E | 3334 |
| *Kobresia capillifolia;*  *Fargesia denudata* | 30°30' 22.47"N, 99°24'6.09"E | 3496 |
| 30°27' 19.37"N, 99°30'26.33"E | 3409 |
| 29° 25' 2.14"N, 99° 54' 1.25"E | 3387 |
| 30° 42' 12.64"N, 100° 5' 32.45"E | 3502 |
| 30° 50' 9.21"N, 100° 8' 42.25"E | 3482 |
| *Salvia przewalskii* | 30° 50' 9.21"N, 100° 11' 42.24"E | 3330 |
| 30° 12' 13.22"N, 100° 14' 15.66"E | 3248 |
| 29° 35' 12.29"N, 100° 17' 23.94"E | 3305 |
| *Salvia przewalskii* | 29° 59' 35.80"N, 100° 22' 33.42"E | 3439 |
| 30° 15' 24.67"N, 100° 30' 4.26"E | 3515 |
| Litang  country | 9 × 3 = 27 | *Abies faxoniana* | 30° 2' 25.66"N, 100° 35' 5.54"E | 3996 |
| 30° 0' 16.22"N, 100° 45' 20.29"E | 3854 |
| 30° 0' 16.22"N, 100° 50' 10.56"E | 3906 |
| *Larix mastersiana* | 30° 2' 34.84"N, 101° 0' 39.65"E | 3941 |
| 30° 3' 1.97"N, 101° 3' 20.36"E | 3842 |
| 30° 2' 34.84"N, 101° 4' 3.25"E | 3922 |
| *Kobresia capillifolia;*  *Larix mastersiana* | 30° 3' 1.97"N, 101° 8' 12.98"E | 3696 |
| 30° 8' 18.22"N, 101° 20' 6.24"E | 3678 |
| 30° 10' 22.38"N, 101° 25' 3.34"E | 3705 |
| Kangding  country | 5 × 3 = 15 | *Larix mastersiana* | 30° 3' 27.04"N, 101° 29' 4.67"E | 2583 |
| 30° 1' 38.06"N, 101° 40' 25.54"E | 2623 |
| *Larix mastersiana* | 30° 1' 38.06"N, 101° 46' 2.35"E | 2708 |
| 30° 1' 30.04"N, 101° 51' 9.95"E | 2660 |
| 30° 2' 15.24"N, 101° 55' 11.42"E | 2689 |
| Tianquan  country | 2 × 6 = 12 | *Rhododendron sichuanense* | 30° 2' 21"N, 102° 47' 42.77"E | 786 |
| 30° 5' 15"N, 102° 30' 35.23"E | 935 |
|  | total = 102 |  |  |  |

**Supplementary Table 2**. **Sampling information of metabolome and metagenome of disturbed soil in different region and elevations**

| Region | sample size of metagenome/metabolome | Sampling site of disturbed soil | Elevation (m) |
| --- | --- | --- | --- |
| Baiyu  country | 4 × 3 = 12 | 30° 15' 58.45"N, 99° 5' 23.44"E | 4206 |
| 30° 30' 42.33"N, 99° 2' 13.08"E | 4235 |
| 30° 39' 35.35"N, 99° 7' 22.47"E | 4005 |
| 30° 37' 23.16"N, 99° 9' 33.25"E | 4124 |
| Yajiang  country | 13 × 3 = 39 | 30° 42' 12.34"N, 99° 10' 14.12"E | 3225 |
| 30° 35' 24.35"N, 99° 15' 15.09"E | 3315 |
| 30°32' 42.15"N, 99°11'12.09"E | 3324 |
| 30°30' 36.59"N, 99°24'10.24"E | 3387 |
| 30°27' 55.23"N, 99°30'23.25"E | 3422 |
| 29° 25' 13.24"N, 99° 54' 24.59"E | 3459 |
| 30° 45' 36.58"N, 100° 2' 38.26"E | 3529 |
| 30° 42' 24.35"N, 100° 5' 30.43"E | 3512 |
| 30° 50' 15.36"N, 100° 8' 25.55"E | 3326 |
| 29° 35' 12.29"N, 100° 17' 23.94"E | 3357 |
| 29° 59' 22.54"N, 100° 22' 30.36"E | 3426 |
| 30° 15' 23.24"N, 100° 25' 10.22"E | 3479 |
| 30° 15' 12.46"N, 100° 30' 3.25"E | 3588 |
| Litang  country | 10 × 3 = 30 | 30° 2' 15.29"N, 100° 35' 4.27"E | 3957 |
| 30° 0' 16.22"N, 100° 45' 18.33"E | 3844 |
| 30° 0' 13.26"N, 100° 50' 14.25"E | 3899 |
| 30° 2' 34.84"N, 101° 0' 37.29"E | 3904 |
| 30° 3' 24.23"N, 101° 3' 25.12"E | 3742 |
| 30° 2' 3.40"N, 101° 4' 3.25"E | 3903 |
| 30° 3' 10.29"N, 101° 8' 18.24"E | 3784 |
| 30° 6' 25.54"N, 101° 13' 2.11"E | 3812 |
| 30° 8' 12.14"N, 101° 20' 1.25"E | 3652 |
| 30° 10' 22.38"N, 101° 23' 3.28"E | 3703 |
| Kangding  country | 4 × 3 = 12 | 30° 3' 22.04"N, 101° 29' 10.22"E | 2604 |
| 30° 1' 30.56"N, 101° 40' 56.25"E | 2537 |
| 30° 1' 38.06"N, 101° 46' 24.38"E | 2764 |
| 30° 1' 36.42"N, 101° 51' 12.04"E | 2615 |
| Tianquan  country | 2×6=12 | 30° 2' 21.20"N, 102° 47' 35.27"E | 783 |
| 30° 5' 15.08"N, 102° 30' 30.22"E | 922 |
|  | total = 102 |  |  |

**Supplementary Table 3**. **Soil carbon pools of disturbed soil and natural soil**

|  | sites | SOC (mg/  g) | 8 monomers of the lignin phenol (mg/kg) | | | | | | | | a total lignin (mg/kg) | MNC (mg/kg) | | | | b total MNC (mg/g) | MNC/SOC | Aggregate carbon  (mg/g) | | | Easily oxidizable carbon  (mg/g) | | |
| --- | --- | --- | --- | --- | --- | --- | --- | --- | --- | --- | --- | --- | --- | --- | --- | --- | --- | --- | --- | --- | --- | --- | --- |
| vanillin | acetovanillone | syringaldehyde | vanillic acid | syringone | syringic acid | p-coumaric acid | ferulic acid | GlcN | ManN | GalN | MurA | AC(0.25-2mm) | AC(0.053-0.25mm) | AC(<0.053mm) | EOC(0.25-2mm) | EOC(0.053-0.25mm) | EOC(<0.053mm) |
| Disturbed soil | 1 | 3.0 | 7.5 | 4.6 | 3.0 | 7.9 | 0.5 | 0.9 | 0.4 | 0.2 | 25.0 | 27.1 | 0.1 | 5.9 | 0.5 | 0.3 | 0.09 | 3.5 | 2.7 | 5.6 | 0.4 | 0.5 | 2.5 |
| 2 | 15.9 | 69.0 | 16.2 | 19.4 | 29.0 | 5.9 | 10.1 | 3.2 | 3.6 | 156.4 | 465.3 | 3.4 | 150.1 | 1.0 | 4.2 | 0.27 | 20.1 | 14.6 | 8.8 | 4.9 | 6.9 | 1.5 |
| 3 | 36.5 | 56.8 | 14.2 | 11.1 | 30.6 | 3.1 | 6.9 | 5.9 | 3.4 | 132.0 | 958.7 | 4.1 | 492.1 | 3.6 | 8.7 | 0.24 | 24.5 | 34.2 | 36.6 | 5.8 | 8.1 | 6.2 |
| 4 | 28.2 | 45.4 | 11.4 | 4.5 | 24.6 | 1.2 | 2.8 | 3.9 | 2.3 | 96.1 | 530.8 | 1.9 | 249.0 | 2.9 | 4.9 | 0.17 | 20.0 | 27.6 | 27.9 | 4.4 | 7.8 | 5.6 |
| 5 | 14.7 | 97.6 | 22.6 | 26.2 | 34.8 | 7.5 | 9.9 | 2.9 | 4.1 | 205.4 | 368.2 | 1.2 | 145.3 | 0.4 | 3.3 | 0.23 | 13.2 | 12.6 | 11.9 | 2.5 | 3.7 | 3.1 |
| 6 | 10.3 | 39.5 | 7.5 | 28.6 | 12.6 | 7.7 | 12.0 | 6.5 | 4.0 | 118.4 | 292.5 | 0.6 | 105.3 | 1.4 | 2.7 | 0.26 | 16.3 | 8.5 | 5.8 | 1.6 | 1.1 | 1.0 |
| 7 | 9.4 | 14.6 | 13.8 | 10.0 | 8.7 | 2.7 | 4.3 | 2.3 | 1.7 | 58.0 | 116.7 | 0.1 | 39.5 | 0.1 | 1.1 | 0.11 | 22.9 | 11.2 | 13.0 | 2.4 | 2.1 | 3.1 |
| 8 | 2.9 | 9.7 | 14.5 | 12.4 | 15.5 | 1.7 | 6.4 | 1.6 | 0.8 | 62.6 | 82.4 | 0.1 | 35.0 | 0.2 | 0.7 | 0.26 | 5.1 | 4.3 | 5.3 | 0.7 | 1.6 | 1.0 |
| 9 | 16.8 | 42.5 | 13.1 | 14.4 | 20.5 | 3.8 | 6.7 | 3.3 | 2.5 | 106.7 | 498.3 | 3.3 | 143.9 | 1.0 | 4.5 | 0.27 | 4.2 | 15.3 | 9.2 | 387.0 | 5.0 | 4.2 |
| 10 | 28.4 | 55.2 | 12.2 | 17.2 | 23.7 | 4.6 | 8.2 | 2.0 | 2.9 | 126.0 | 502.1 | 4.2 | 251.4 | 2.7 | 4.6 | 0.16 | 18.7 | 25.9 | 34.7 | 4.9 | 7.3 | 6.1 |
| 11 | 15.9 | 32.6 | 10.5 | 15.2 | 24.4 | 5.2 | 7.2 | 3.1 | 3.8 | 101.9 | 411.8 | 2.4 | 154.3 | 1.1 | 3.7 | 0.24 | 14.5 | 14.4 | 8.4 | 3.4 | 4.3 | 4.0 |
| 12 | 7.7 | 28.3 | 10.7 | 9.3 | 14.4 | 3.7 | 6.7 | 1.8 | 2.0 | 76.7 | 84.3 | 0.1 | 26.8 | 0.4 | 0.8 | 0.10 | 9.9 | 5.4 | 5.1 | 2.8 | 2.0 | 3.0 |
| 13 | 21.8 | 45.3 | 19.4 | 21.6 | 25.4 | 2.0 | 9.7 | 3.0 | 2.1 | 128.4 | 524.3 | 1.9 | 205.6 | 1.6 | 4.8 | 0.22 | 18.4 | 20.3 | 30.5 | 4.1 | 5.7 | 5.4 |
| Natural soil | 1 | 199.7 | 1728.4 | 844.4 | 102.0 | 766.8 | 52.6 | 79.6 | 39.2 | 93.1 | 3706.1 | 3956.0 | 12.8 | 2090.2 | 34.8 | 36.7 | 0.18 | 90.1 | 180.7 | 123.4 | 35.7 | 55.2 | 34.9 |
| 2 | 115.2 | 428.4 | 188.0 | 119.5 | 226.1 | 54.6 | 86.7 | 24.4 | 37.6 | 1165.3 | 4873.8 | 7.0 | 1890.9 | 5.5 | 44.0 | 0.38 | 65.4 | 110.5 | 70.7 | 16.5 | 28.2 | 19.9 |
| 3 | 118.1 | 1268.4 | 439.2 | 90.7 | 455.9 | 36.7 | 56.2 | 25.3 | 50.2 | 2422.7 | 1370.3 | 2.2 | 566.0 | 2.2 | 12.4 | 0.11 | 7.1 | 8.2 | 7.3 | 1.9 | 1.2 | 1.0 |
| 4 | 152.3 | 592.3 | 268.9 | 123.1 | 298.9 | 57.1 | 91.3 | 40.9 | 49.7 | 1522.1 | 870.5 | 1.0 | 371.9 | 0.9 | 7.9 | 0.05 | 75.8 | 30.7 | 85.3 | 26.0 | 20.5 | 20.4 |
| 5 | 19.5 | 124.6 | 27.4 | 98.0 | 36.6 | 43.7 | 51.7 | 76.1 | 26.6 | 484.7 | 1085.9 | 2.3 | 590.9 | 1.5 | 9.8 | 0.50 | 27.7 | 35.0 | 20.7 | 9.8 | 10.0 | 5.5 |
| 6 | 9.1 | 60.6 | 11.7 | 25.9 | 17.4 | 6.4 | 9.5 | 10.4 | 6.4 | 148.3 | 63.3 | 0.4 | 14.7 | 1.1 | 0.6 | 0.07 | 140.9 | 88.7 | 87.2 | 33.6 | 21.4 | 21.3 |
| 7 | 155.1 | 50.6 | 8.3 | 40.2 | 13.1 | 14.5 | 18.8 | 20.2 | 7.9 | 173.6 | 94.9 | 0.4 | 25.9 | 2.1 | 0.9 | 0.01 | 7.9 | 9.2 | 10.1 | 1.8 | 3.5 | 2.4 |
| 8 | 201.6 | 1726.9 | 832.1 | 101.7 | 763.8 | 50.3 | 78.7 | 37.9 | 92.5 | 3683.9 | 3909.4 | 12.1 | 2053.8 | 35.6 | 36.3 | 0.18 | 88.6 | 177.6 | 109.9 | 33.2 | 57.2 | 35.2 |
| 9 | 92.5 | 109.2 | 356.4 | 78.3 | 315.7 | 26.0 | 38.2 | 20.1 | 43.7 | 987.5 | 3245.8 | 6.3 | 1024.6 | 6.5 | 29.4 | 0.32 | 63.3 | 55.2 | 62.3 | 18.7 | 21.7 | 23.4 |
| 10 | 143.0 | 735.2 | 356.3 | 59.0 | 705.5 | 30.3 | 46.3 | 19.3 | 57.2 | 2009.0 | 103.3 | 4.3 | 726.0 | 3.9 | 1.1 | 0.01 | 43.9 | 76.6 | 83.7 | 22.2 | 39.3 | 28.5 |
| 11 | 78.7 | 526.4 | 248.2 | 43.0 | 103.2 | 38.5 | 35.3 | 29.6 | 15.4 | 1039.6 | 200.6 | 2.6 | 275.4 | 2.0 | 1.9 | 0.02 | 58.9 | 46.6 | 44.0 | 15.3 | 20.5 | 21.6 |
| 12 | 202.0 | 934.3 | 803.7 | 98.6 | 535.0 | 50.2 | 64.5 | 61.9 | 45.3 | 2593.4 | 2985.7 | 12.0 | 1936.7 | 30.8 | 27.9 | 0.14 | 91.4 | 175.4 | 112.5 | 31.0 | 53.6 | 33.7 |
| 13 | 132.8 | 624.4 | 455.9 | 62.3 | 435.3 | 50.3 | 73.3 | 36.6 | 45.5 | 1783.5 | 1254.9 | 2.4 | 695.4 | 22.7 | 12.0 | 0.09 | 52.2 | 69.2 | 59.3 | 21.7 | 42.6 | 25.6 |

**a total lignin = the sum of 8 lignin phenol monomers; b total MNC is calculated using formula (2)-(4). The data is the average value of 3 samples in each site.**

**Supplementary Table 4**. **47 Significantly differential metabolites appeared in the whole dataset of metabolome between disturbed soil and natural soil**

| ID | compound name | KEGG | Class | MEAN Nb | MEAN Dc | VIPd | P-Valuee | Fold_Changef | Log_Foldchange |
| --- | --- | --- | --- | --- | --- | --- | --- | --- | --- |
| 1 | Ethanolamine | C00189 | Biogenic Amines | 3.940 | 0.688 | 1.176 | 0.000 | 0.175 | -2.518 |
| 2 | Choline | C00114 | Biogenic Amines | 5.886 | 2.331 | 1.328 | 0.000 | 0.396 | -1.336 |
| 3 | 4-Aminobutyric acid | C00334 | Amino acids, peptides, and analogues | 1.773 | 0.106 | 1.371 | 0.000 | 0.060 | -4.070 |
| 4 | L-Proline | C00148 | Amino acids, peptides, and analogues | 1.857 | 0.796 | 1.153 | 0.000 | 0.428 | -1.223 |
| 5 | L-Valine | C00183 | Amino acids, peptides, and analogues | 7.556 | 1.717 | 1.054 | 0.000 | 0.227 | -2.138 |
| 6 | Thymine | C00178 | Pyrimidines and pyrimidine derivatives | 8.588 | 1.023 | 1.403 | 0.000 | 0.119 | -3.069 |
| 7 | L-Leucine | C00123 | Amino acids, peptides, and analogues | 2.158 | 0.305 | 1.754 | 0.000 | 0.142 | -2.821 |
| 8 | Adenine | C00147 | Purines and purine derivatives | 0.564 | 0.122 | 1.664 | 0.000 | 0.216 | -2.209 |
| 9 | L-Lysine | C00047 | Amino acids, peptides, and analogues | 23.524 | 7.802 | 1.020 | 0.000 | 0.332 | -1.592 |
| 10 | L-Methionine | C00073 | Amino acids, peptides, and analogues | 0.190 | 0.028 | 1.329 | 0.000 | 0.147 | -2.769 |
| 11 | L-Carnitine | C00318 | Biogenic Amines | 0.548 | 0.072 | 1.325 | 0.000 | 0.131 | -2.933 |
| 12 | L-Phenylalanine | C00079 | Amino acids, peptides, and analogues | 1.426 | 0.228 | 1.726 | 0.000 | 0.160 | -2.645 |
| 13 | Adenosine | C00212 | Nucleosides, nucleotides, and analogues | 1.352 | 0.384 | 1.598 | 0.000 | 0.284 | -1.818 |
| 14 | Pantothenic acid | C00864 | Organic acids and derivatives | 0.158 | 0.016 | 1.400 | 0.000 | 0.098 | -3.346 |
| 15 | Nicotinic acid | C00253 | Pyridines and derivatives | 0.066 | 0.015 | 1.480 | 0.000 | 0.234 | -2.097 |
| 16 | Hypoxanthine | C00262 | Purines and purine derivatives | 0.011 | 0.001 | 1.679 | 0.000 | 0.070 | -3.837 |
| 17 | Inositol | C00137 | Others | 9.062 | 2.365 | 1.019 | 0.000 | 0.261 | -1.938 |
| 18 | Thymidine | C00214 | Nucleosides, nucleotides, and analogues | 3.615 | 0.404 | 1.829 | 0.000 | 0.112 | -3.161 |
| 19 | Uridine | C00299 | Nucleosides, nucleotides, and analogues | 6.874 | 1.009 | 1.640 | 0.000 | 0.147 | -2.769 |
| 20 | Inosine | C00294 | Nucleosides, nucleotides, and analogues | 1.651 | 0.232 | 1.541 | 0.000 | 0.140 | -2.832 |
| 21 | 3-Hydroxybutyric acid | C01089 | Organic acids and derivatives | 16.224 | 4.826 | 1.315 | 0.000 | 0.297 | -1.749 |
| 22 | Phenylethylamine | C05332 | Biogenic amines | 0.056 | 0.005 | 1.361 | 0.001 | 0.085 | -3.558 |
| 23 | Picolinic acid | C10164 | Pyridines and derivatives | 0.023 | 0.005 | 1.344 | 0.000 | 0.204 | -2.296 |
| 24 | 5-Methylcytosine | C02376 | Pyrimidines and pyrimidine derivatives | 0.015 | 0.001 | 1.582 | 0.000 | 0.100 | -3.323 |
|  |  |  |  |  |  |  |  |  |  |
| 25 | Indole-3-carboxylic acid | C19837 | Indoles and derivatives | 18.475 | 7.399 | 1.031 | 0.000 | 0.400 | -1.320 |
| 26 | L-Sorbose | C00247 | Carbohydrates and carbohydrate conjugates | 9.675 | 1.148 | 1.450 | 0.000 | 0.119 | -3.076 |
| 27 | N6-Acetyl-L-lysine | C02727 | Amino acids, peptides, and analogues | 0.029 | 0.012 | 1.055 | 0.000 | 0.396 | -1.335 |
| 28 | D-Glucuronate | C00191 | Carbohydrates and carbohydrate conjugates | 0.059 | 0.004 | 1.427 | 0.000 | 0.072 | -3.789 |
| 29 | 2'-Deoxyuridine | C00526 | Nucleosides, nucleotides, and analogues | 0.977 | 0.059 | 1.681 | 0.000 | 0.060 | -4.055 |
| 30 | 2'-Deoxyadenosine | C00559 | Nucleosides, nucleotides, and analogues | 1.056 | 0.143 | 1.701 | 0.000 | 0.135 | -2.887 |
| 31 | Xanthosine | C01762 | Nucleosides, nucleotides, and analogues | 0.008 | 0.001 | 1.695 | 0.000 | 0.069 | -3.865 |
| 32 | Trehalose | C01083 | Carbohydrates and carbohydrate conjugates | 287.404 | 87.178 | 1.429 | 0.000 | 0.303 | -1.721 |
| 33 | Deoxyguanosine | C00330 | Nucleosides, nucleotides, and analogues | 3.123 | 0.290 | 1.401 | 0.000 | 0.093 | -3.430 |
| 34 | 5-Methylcytidine |  | Nucleosides, nucleotides, and analogues | 0.003 | 0.000 | 1.689 | 0.000 | 0.080 | -3.645 |
| 35 | L-Tryptophan | C00078 | Amino acids, peptides, and analogues | 0.198 | 0.043 | 1.131 | 0.000 | 0.216 | -2.210 |
| 36 | L-Glutamine | C00025 | Amino acids, peptides, and analogues | 1.218 | 0.175 | 1.227 | 0.004 | 0.144 | -2.797 |
| 37 | D-Tagatose | C00795 | Carbohydrates and carbohydrate conjugates | 23.206 | 5.955 | 1.156 | 0.000 | 0.257 | -1.962 |
| 38 | Isonicotinic acid | C07446 | Pyridines and derivatives | 0.242 | 0.058 | 1.234 | 0.000 | 0.240 | -2.060 |
| 39 | D-Glucuronic Acid | C00191 | Others | 0.058 | 0.004 | 1.390 | 0.000 | 0.073 | -3.766 |
| 40 | O-Acetylcarnitine | C02571 | Lipids | 0.183 | 0.037 | 1.371 | 0.000 | 0.200 | -2.321 |
| 41 | Guanosine | C00387 | Nucleosides, nucleotides, and analogues | 0.586 | 0.075 | 1.683 | 0.000 | 0.127 | -2.975 |
| 42 | D-(+)-Glucose | C00031 | Carbohydrates and carbohydrate conjugates | 142.884 | 22.083 | 1.303 | 0.000 | 0.155 | -2.694 |
| 43 | Benzoylformic acid | C02137 | Benzenoids | 0.035 | 0.011 | 1.092 | 0.000 | 0.329 | -1.605 |
| 44 | Isoamylamine | C02640 | Biogenic Amines | 2.882 | 0.718 | 1.379 | 0.001 | 0.249 | -2.005 |
| 45 | Propionylcarnitine | C03017 | Lipids | 0.006 | 0.001 | 1.260 | 0.000 | 0.195 | -2.359 |
| 46 | 5-methyl-2'-deoxycytidine | C03592 | Nucleosides, nucleotides, and analogues | 0.015 | 0.001 | 1.652 | 0.000 | 0.083 | -3.589 |
| 47 | 1,5-Anhydro-D-Glucitol | C07326 | Carbohydrates and carbohydrate conjugates | 0.197 | 0.038 | 1.282 | 0.000 | 0.191 | -2.386 |

a KEGG ID of each SDMs. b average concentration of SDMs in natural soil of 102 samples, c average concentration of SDMs in disturbed soil of 102 samples, d variable importance values by OPLS-DA, e P-value by student t-test, f the ratio of substance content in disturbed soil groups against the control, FC<1 means down-regulated metabolites, FC>1 means up-regulated metabolites.

**Supplementary Table 5** **The effect size (Cohen's d) and the standard deviation (SD) for each of the 10 signature metabolites**

| Compound namea | Thy  mine | Ade  nine | Adeno  sine | Thymi  dine | Uri  dine | 5'-Methyl  cytosine | 2'-Deoxy  adenosine | 5'-Methyl  cytidine | Guanosine | 5'-methyl-2'-  deoxycytidine |
| --- | --- | --- | --- | --- | --- | --- | --- | --- | --- | --- |
| SD_pools | 3.83 | 0.17 | 0.58 | 1.27 | 2.40 | 0.01 | 0.33 | 0.00 | 0.23 | 0.01 |
| Cohen's db | 4.12 | 3.28 | 2.14 | 4.22 | 3.00 | 3.61 | 4.60 | 2.56 | 2.90 | 4.10 |

a 10 signature metabolites screened out by Z score analysis; b cohen’s d ≈ 0.2: small difference, d ≈ 0.5: significant difference, d ≥ 0.8: highly significant difference; nD = 102; nN = 102b

**Supplementary Table 6**. **Internal standard RSD of QC samples**

| POS internal standard | RSD[%] a | NEG internal standard | RSD[%] |
| --- | --- | --- | --- |
| pIS-01 | 9.44 | nIS-01 | 9.77 |
| pIS-02 | 5.96 | nIS-02 | 9.22 |
| pIS-03 | 8.98 | nIS-03 | 7.85 |

a response difference


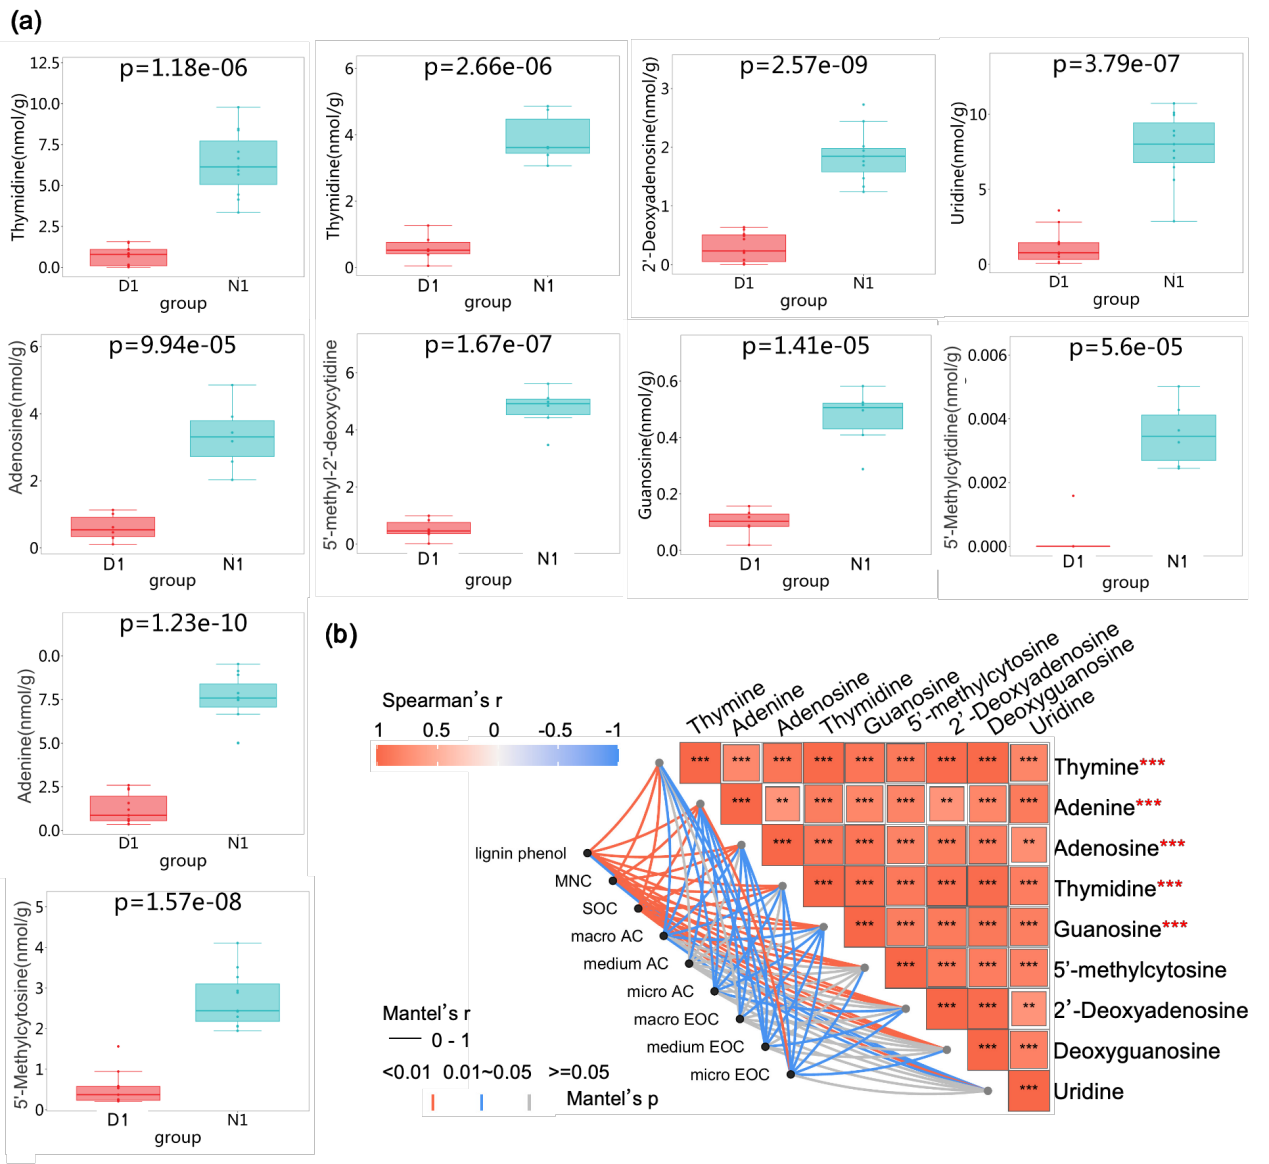


**Supplementary Fig. 1**. **Differential abundance of metabolic signatures and their correlation with soil carbon pools**. **a**, Boxplot illustrating the differential abundance of the top 10 SDMs (identified via Z-score analysis) between disturbed and natural soils. Significance (*p* value) for each metabolite comparison is indicated at the top of the respective subplot. **b**, Mantel test results demonstrating significant correlations between the nucleotide matrix and macro-scale stable carbon fractions (MNC, lignin, AAOC). Line width proportional to the Mantel’s *r* statistic (*P* < 0.05).

**
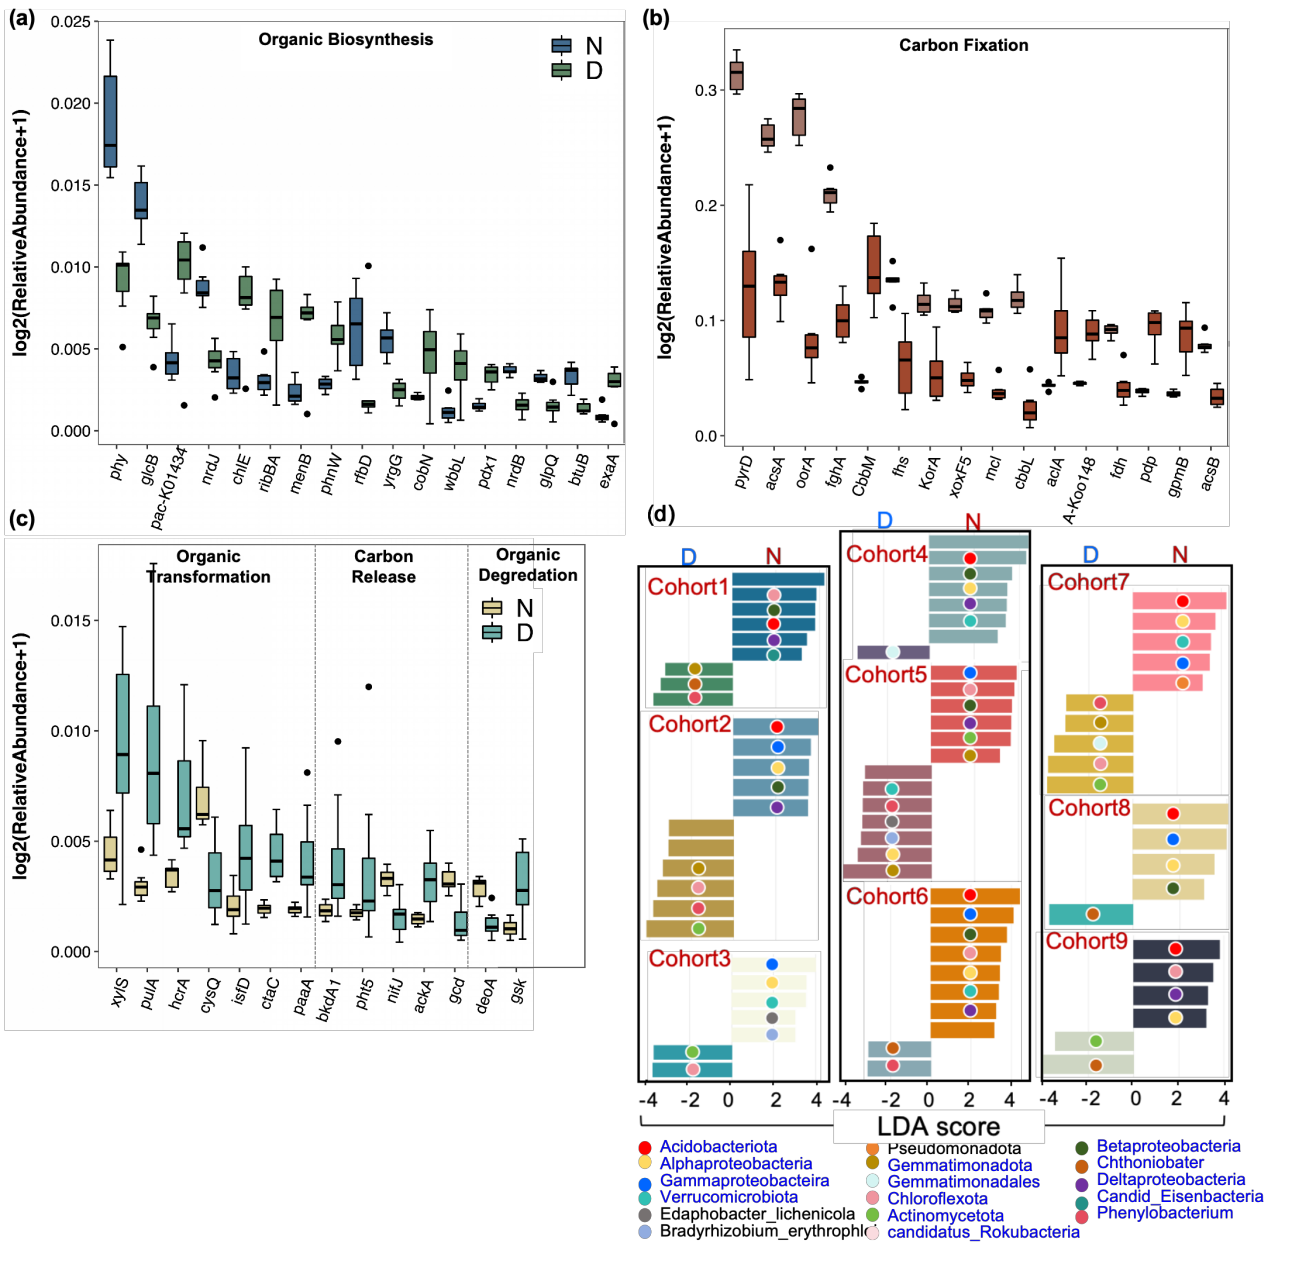
**

**Supplementary Fig. 2** **Differential analysis of C-genes and taxa in metagenome**. **a-c**, The boxplot displays the abundance difference of 48 CCycDB genes (https://ccycdb.github.io/)(P < 0.05). The genes were classified at the category 1 level in different colors. **d**, Taxonomic drivers of carbon flux. Linear Discriminant Analysis (LDA) identifying the ecological shift from "carbon-builders" to "carbon-degraders." The plot highlights the depletion of rhizosphere-dominant taxa (e.g., *Acidobacteriota*, *Betaproteobacteria*) and the enrichment of recalcitrant carbon degraders (e.g., *Actinomycetota*, *Gemmatimonadales*).

**
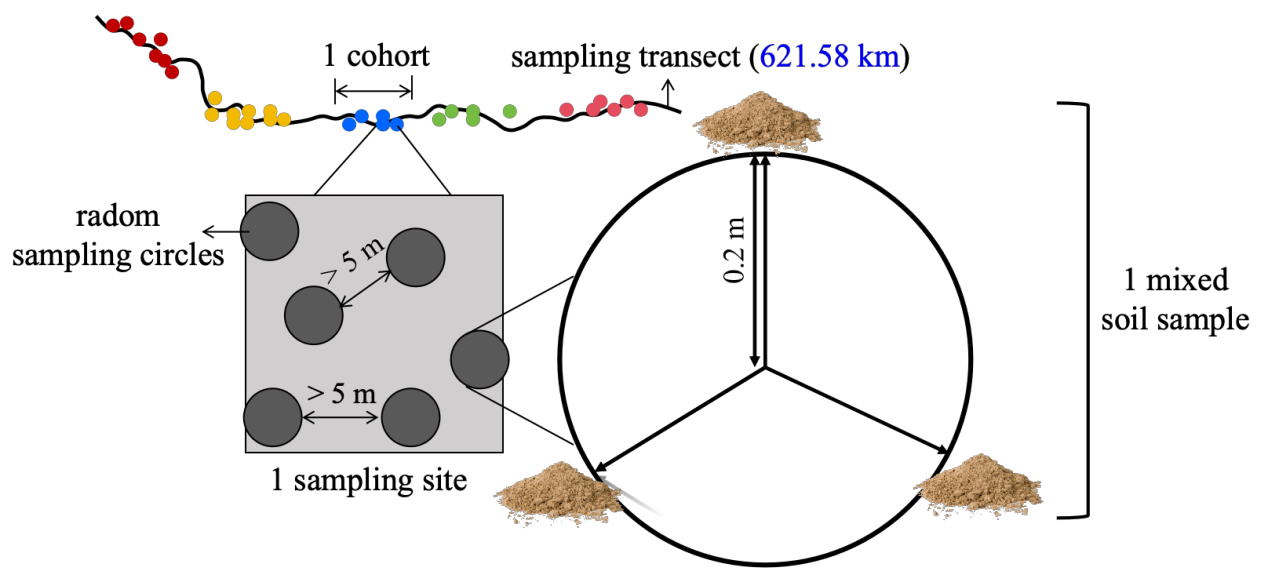
**

**Supplementary Fig. 3 The sampling scheme**. Colored spots represent the mixed sampling sites in 5 cohort across the transect. Each sampling sites was set 3~6 random circles plots (radius 0.2 m).

**
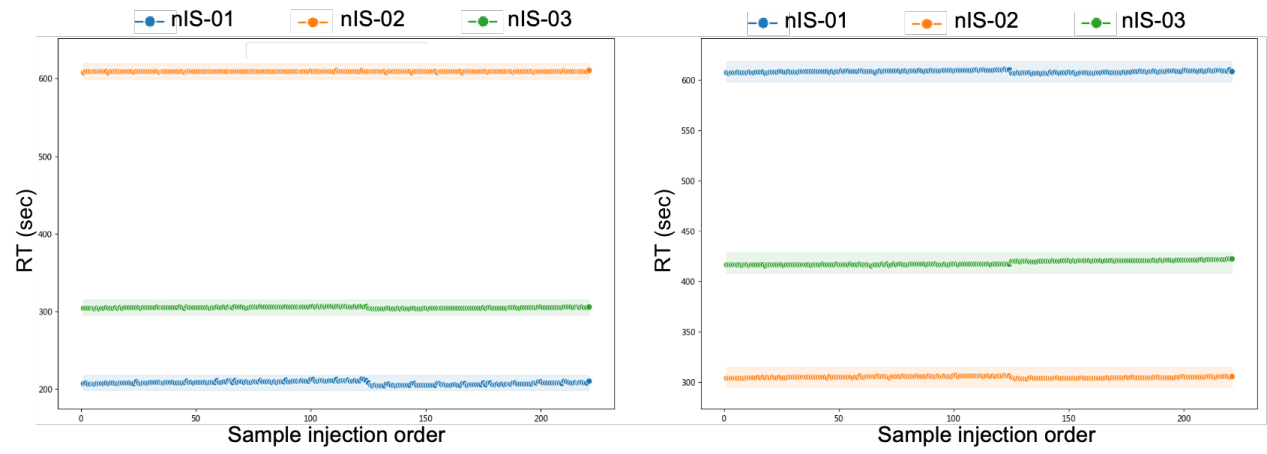
**

**Supplementary Fig. 4 QC and sample positive/negative ion internal standard retention time quality control chart.** One QC sample was inserted every 10 samples (equal volume of supernatant was taken from each sample as 1 QC sample). All injected samples and QC retention times were within ± 10 S of the expected retention times, which qualified the stability of instrument data.
